# Supplementary material for: Arabidopsis NUCLEOSTEMIN-LIKE 1 (NSN1) regulates cell cycling potentially by cooperating with nucleosome assembly protein AtNAP1;1
Source: PubMed Central journal article supplement (PMC5984758; doi:10.1186/s12870-018-1289-2), 2018-06-01
Supplement: 12870_2018_1289_MOESM2_ESM.pdf [file 12870_2018_1289_MOESM2_ESM.pdf]

Table S1. Analysis of protein identity among AtNRP1s and AtNRPs.

|          | AtNAP1;1 | AtNAP1;2 | AtNAP1;3 | AtNAP1;4 | AtNRP1 | AtNRP2 |
|----------|----------|----------|----------|----------|--------|--------|
| AtNAP1;1 | 100.0%   |          |          |          |        |        |
| AtNAP1;2 | 72.4%    | 100.0%   |          |          |        |        |
| AtNAP1;3 | 80.3%    | 76.8%    | 100.0%   |          |        |        |
| AtNAP1;4 | 46.4%    | 46.2%    | 44.9%    | 100.0%   |        |        |
| AtNRP1   | 18.9%    | 17.6%    | 19.2%    | 20.4%    | 100.0% |        |
| AtNRP2   | 21.9%    | 22.4%    | 22.9%    | 19.6%    | 71.3%  | 100.0% |
